# Supplementary material
Source: PubMed Central journal article supplement (PMC4592820)
Supplement: NIHMS714579-supplement-1.pdf [file NIHMS714579-supplement-1.pdf]

Figure S1

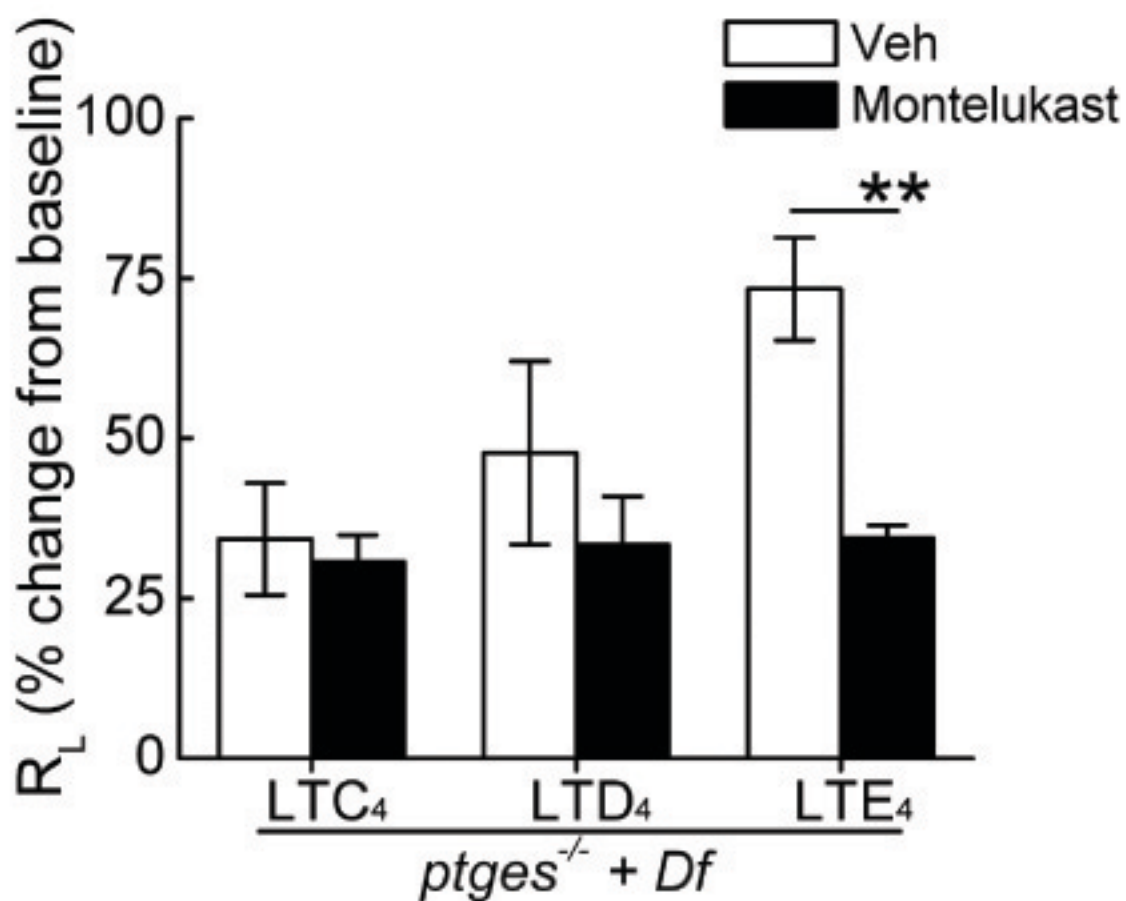

Supplemental Figure 1. Effect of Montelukast treatment on cys-LT-mediated changes in  $R_L$  in  $Df$ -primed  $ptges^{-/-}$  mice. Results are from 3 mice/group. \* $P = 0.01$ .
